# Supplementary material
Source: PubMed Central journal article supplement (PMC9868106)
Supplement: NIHMS1861241-supplement-1.pdf [file NIHMS1861241-supplement-1.pdf]

1 Supplemental materials

Figure S1

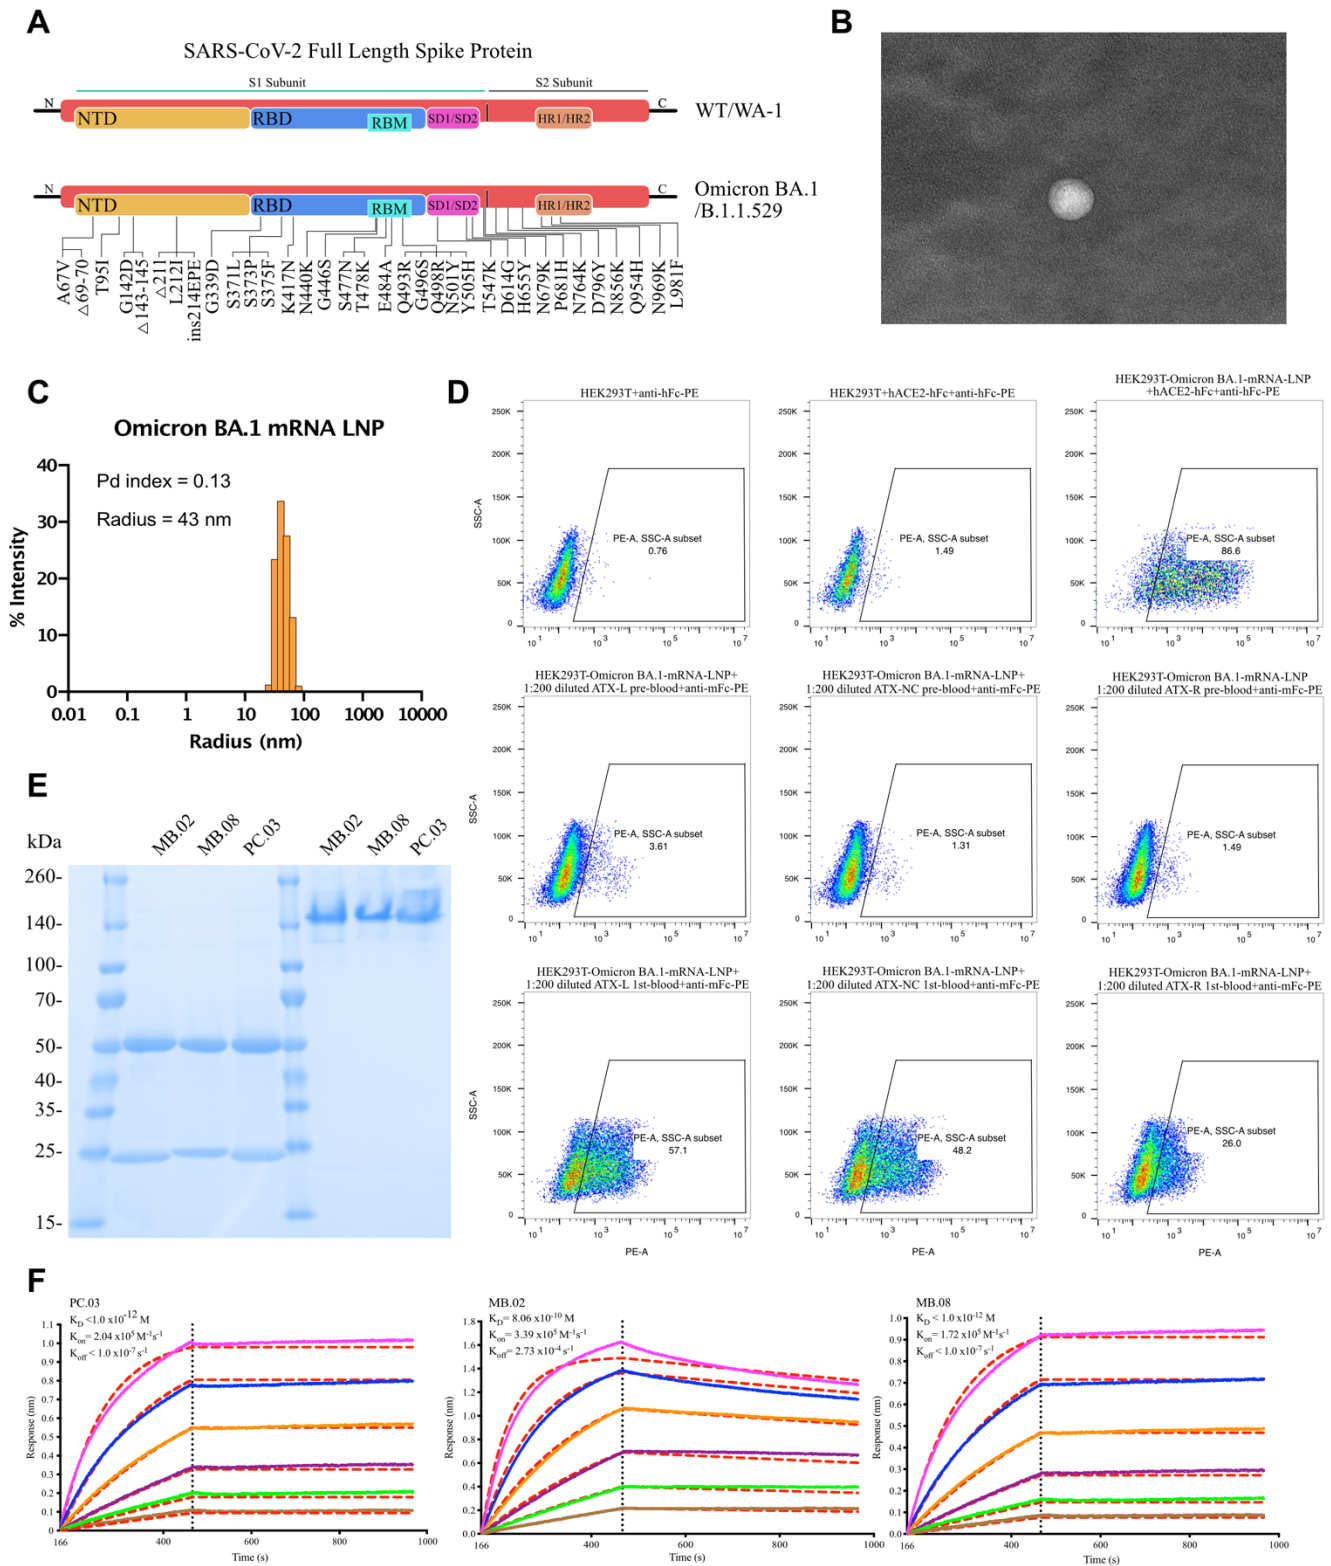

3 **Figure S1. Characterization of Omicron BA.1-spike specific LNP-mRNAs, and biophysics of**  
4 **leading antibody clones, Related to Figures 1 and 2**

5 **A**, Schematic showing the domain arrangement of the SARS-CoV-2 WT spike and its recent variant SARS-  
6 CoV-2 B.1.1.529 (Omicron BA.1). Mutations present in Omicron spike protein are labeled. Full-length  
7 Omicron BA.1 spike gene was synthesized to construct Omicron BA.1-specific mRNA-lipid nanoparticle  
8 and Omicron BA.1-specific pseudo-virus.

9 **B**, Omicron BA.1 LNP-mRNA image collected on transmission electron microscope.

10 **C**, Dynamic light scattering derived histogram depicting the particle radius distribution of Omicron BA.1  
11 spike LNP-mRNAs

12 **D**, Human ACE2 receptor binding of Omicron BA.1 spike expressed in HEK293T cells as detected by  
13 human ACE2-Fc fusion protein and PE-anti-human Fc antibody on flow cytometry.

14 **E**, SDS-PAGE analysis of purified mAbs under nonreducing and reducing (10mM DTT) conditions. Four  
15 micrograms of purified protein were analyzed using a Novex WedgeWell 4-20% (wt/vol) Tris-Glycine gel.

16 **F**, Binding characteristics of the neutralizing mAbs determined by using BLI. Recombinant SARS-CoV-2  
17 Omicron BA.1 RBD were covalently immobilized onto a HIS1K sensor, all measurements were performed  
18 by using a serial 2-fold dilution of purified mAbs, starting from 50 nM (Magenta) to 1.56 nM (Brown).  
19 Global fit curves are shown as red dashed lines, The vertical black dotted dashed lines indicate the transition  
20 between association and disassociation phases.

21

**Figure S2**

**Memory B**

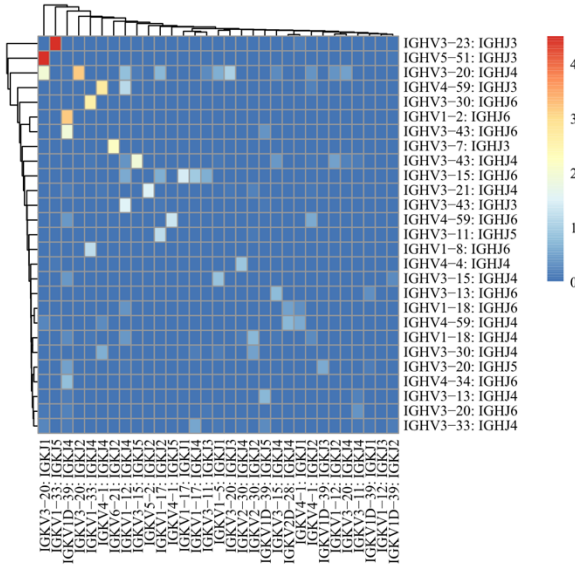

**PBMC**

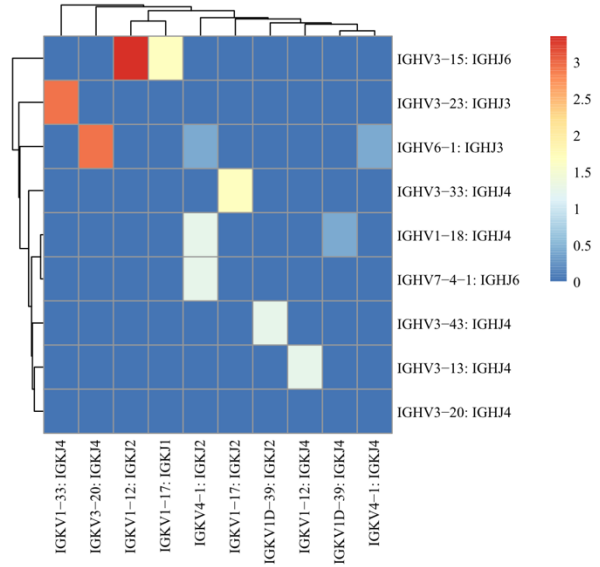

**Plasma B**

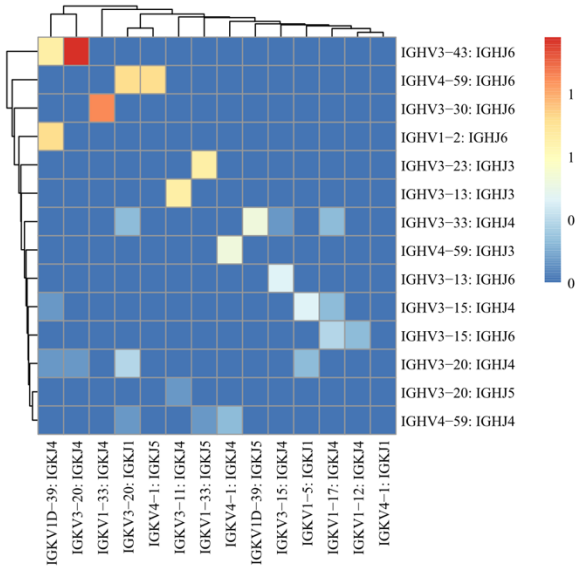

23 **Figure S2. Heatmaps for non-stochastic paired BCR repertoire, Related to Figures 1 and 2**

24 Heatmaps showing the paired of immunoglobulin heavy chains and light chains gene variable region segment  
25 of clonotypes in Omicron BA.1-RAMIHM mouse. The reader color means the percentage of higher usage  
26 of specific VH-VL gene pairs. Memory B library, Plasma B library and PBMC library were shown in  
27 separate plots.

28 Source data and additional statistics for experiments are in supplemental excel file(s).

29

**Figure S3**

**A Memory B**

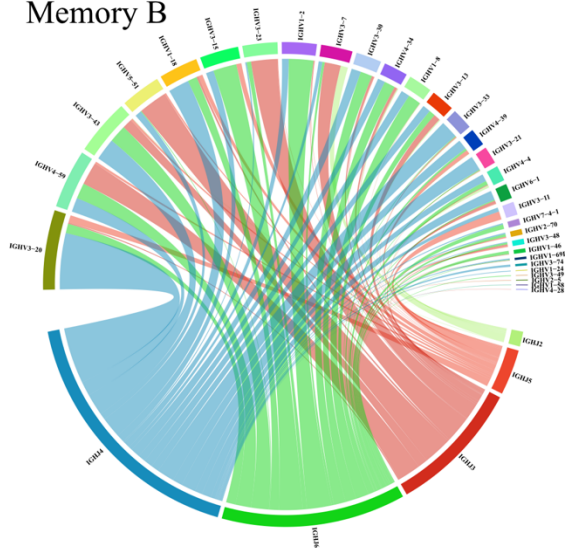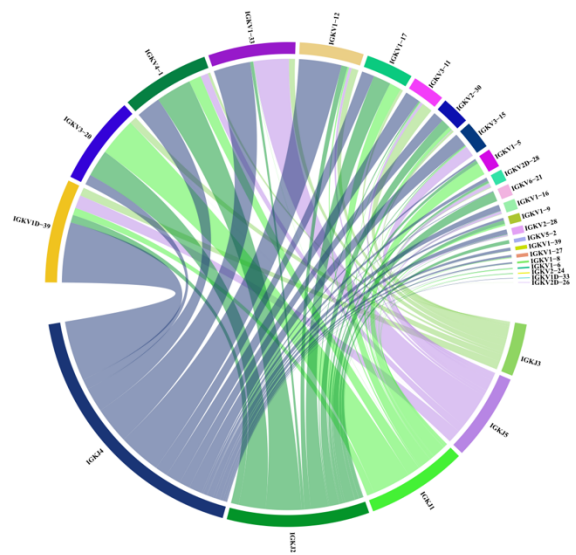

**B PBMC**

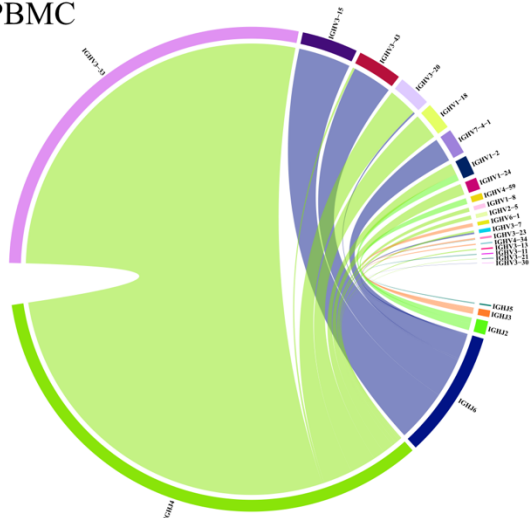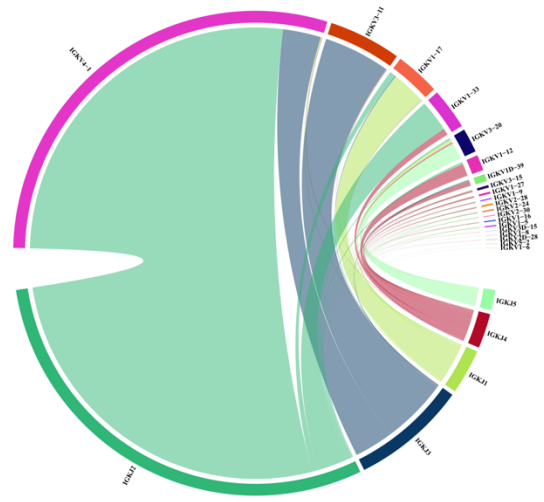

**C Plasma B**

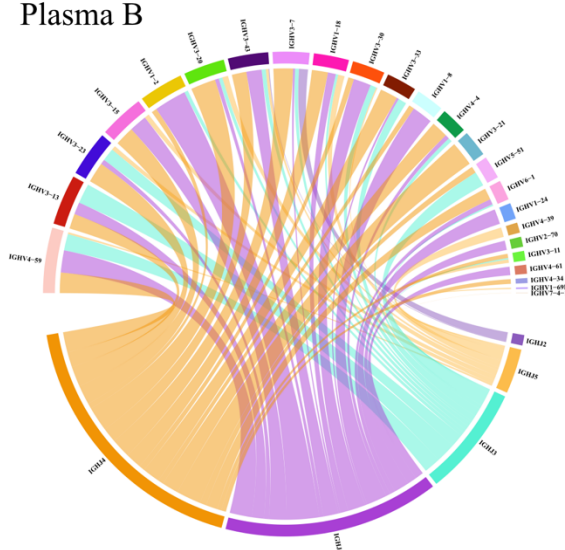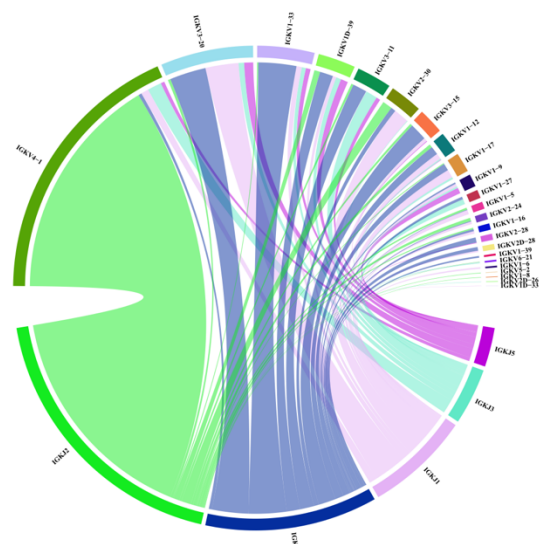

31 **Figure S3. Distribution of heavy- and light- chain V/J segment recombination in Omicron BA.1-**  
32 **RAMIHM mouse, Related to Figures 1 and 2**

33 Chord diagrams (circo plots) showing the distribution of all heavy- and light-chain V and J gene-segment  
34 recombination obtained in each representative library. Interconnecting lines indicate the relationship  
35 between antibodies that share V and J gene-segment at both IGH and IGL.

36 **A.** Memory B library,

37 **B.** PBMC library,

38 **C.** Plasma B library.

39 Source data and additional statistics for experiments are in supplemental excel file(s).

40

Figure S4

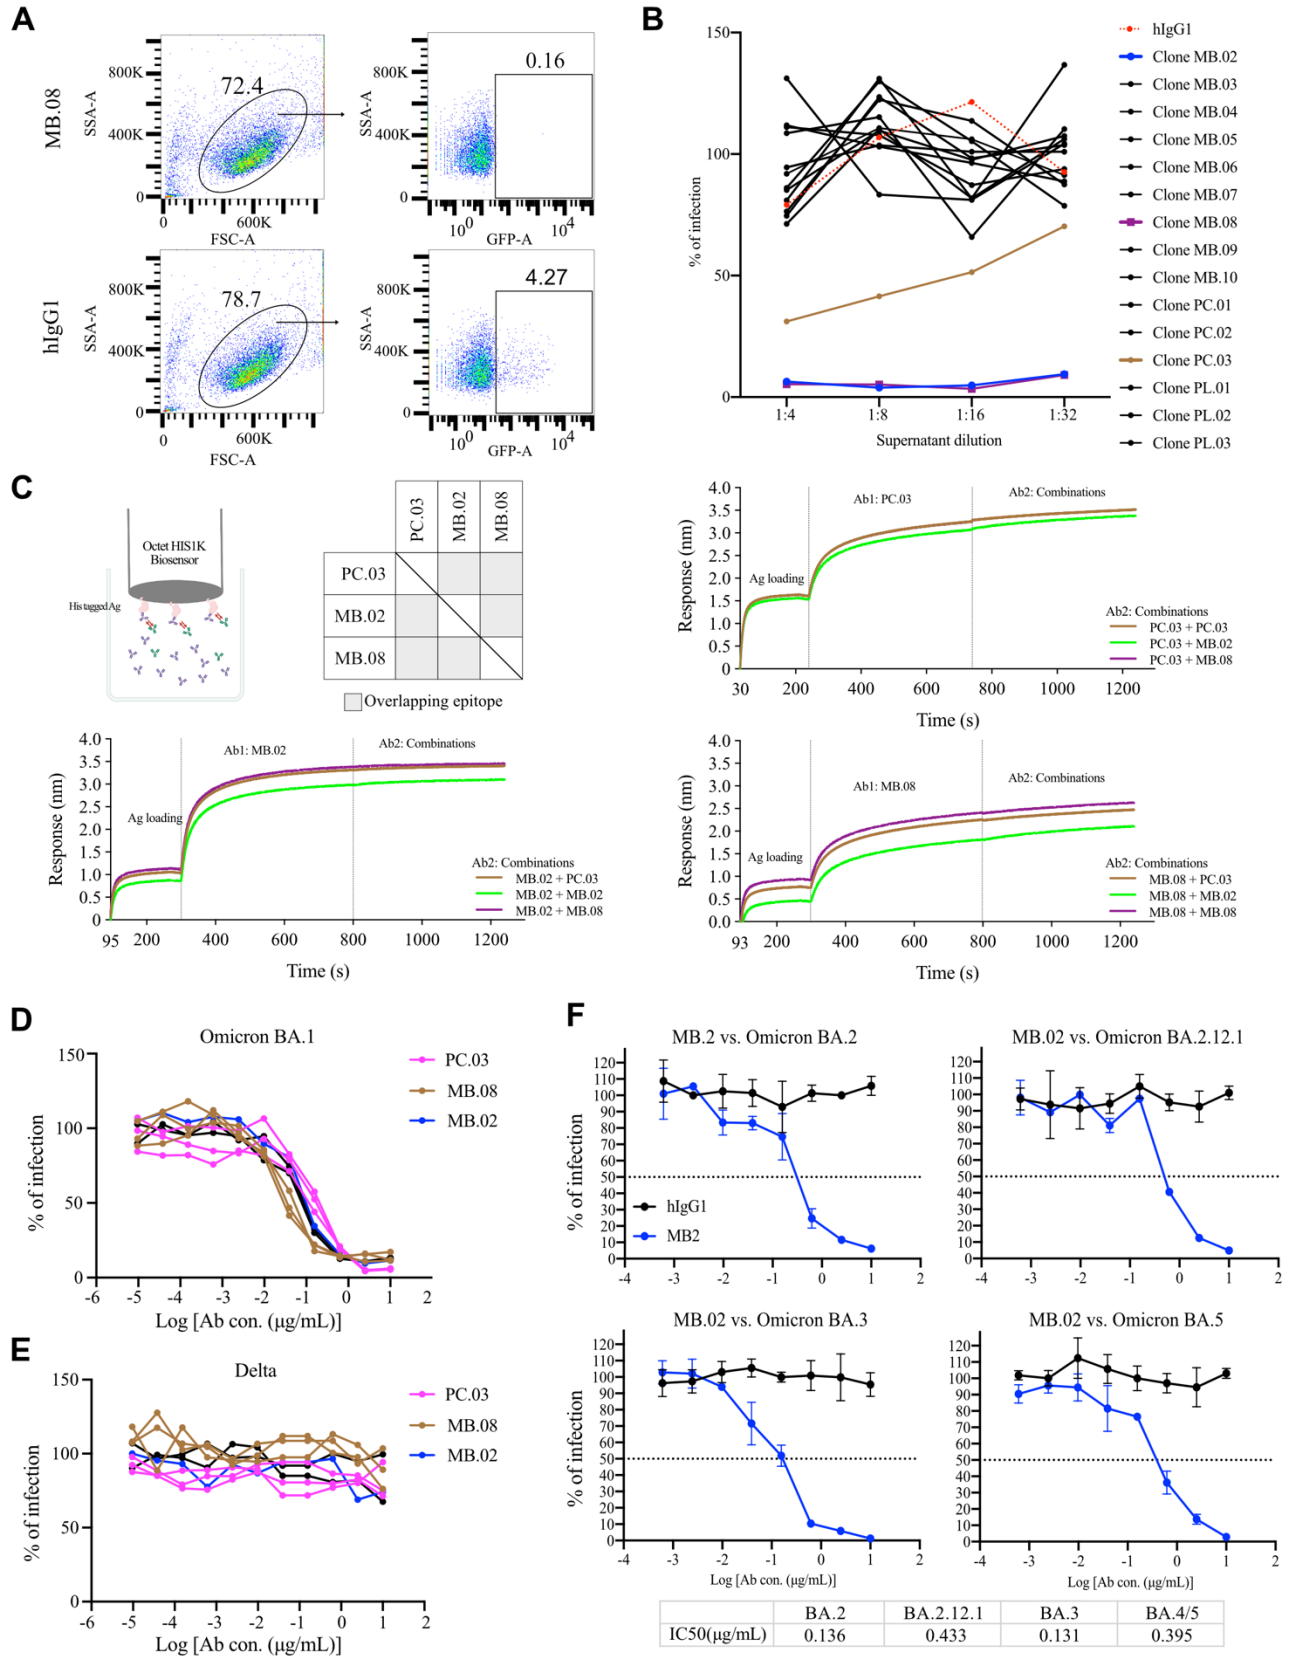

42 **Figure S4. Neutralizing abilities and epitope binning of the potent neutralizing mAbs, Related to**  
43 **Figure 2**

44 **A**, Gating strategy used for GFP-based neutralization analysis.

45 **B**, Neutralization potency measured by using a pseudovirus neutralization assay. Data for each mAb were  
46 obtained from a representative neutralization experiment, which contains three replicates. Data are graphed  
47 as percentage neutralization relative to virus-only infection control.

48 **C**, Schematic of epitope binning experiment. Summary data of BLI (C) results. The matrix presents the  
49 concluded epitope specificity for each competition experiments. The column indicated the primary loading  
50 antibody, and the row indicated the secondary antibody combinations. Epitope binning of the three potent  
51 neutralizing mAbs. Sensorgram show distinct binding patterns when pairs of testing antibodies were  
52 sequentially applied to the recombinant SARS-CoV2 Omicron BA.1 RBD covalently immobilized onto a  
53 HIS1K sensor. The level of increment in response unit comparing with or without prior antibody incubation  
54 is the key criteria for determining the two mAbs recognize the separate or closely situated epitopes.

55 **D**, Individual neutralization curves for leading Omicron mAbs against Omicron BA.1 pseudovirus.

56 **E**, Individual neutralization curves for leading Omicron mAbs against Delta pseudovirus.

57 **F**, MB.02 neutralizes spike-coated pseudoviruses of currently circulating Omicron sublineages. The graph  
58 presents the normalized GFP signals for detection of HEK293T-ACE2 cells, 24 h after infection with  
59 pseudovirus of currently circulating Omicron sublineages, in the presence of increasing concentration of  
60 indicated Omicron mAb.

61 Source data and additional statistics for experiments are in supplemental excel file(s).

62



**Figure S5**

**A CD22-memory B**

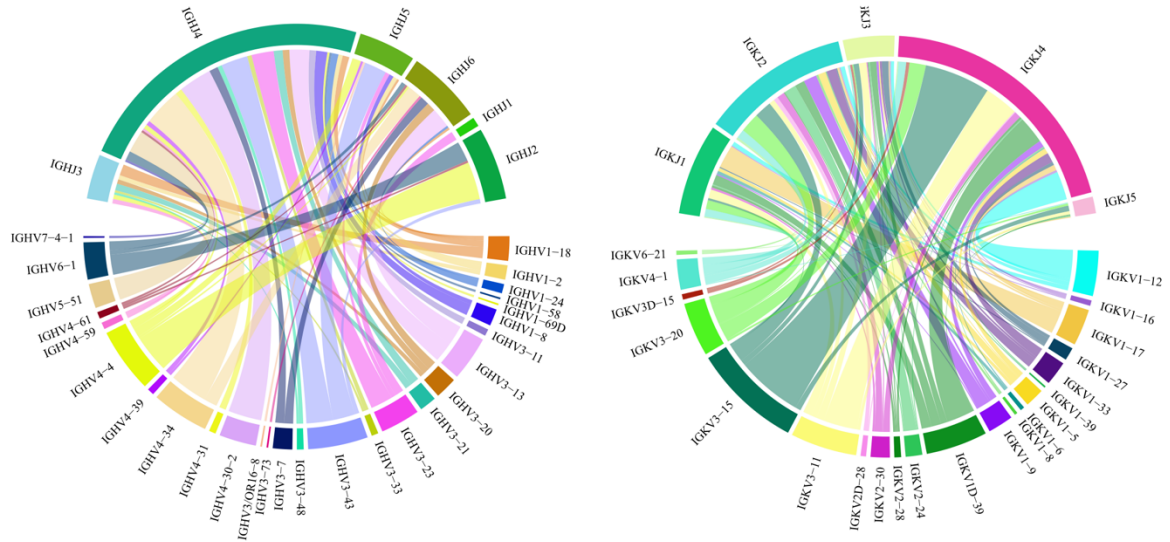

**B GPRC5D-memory B**

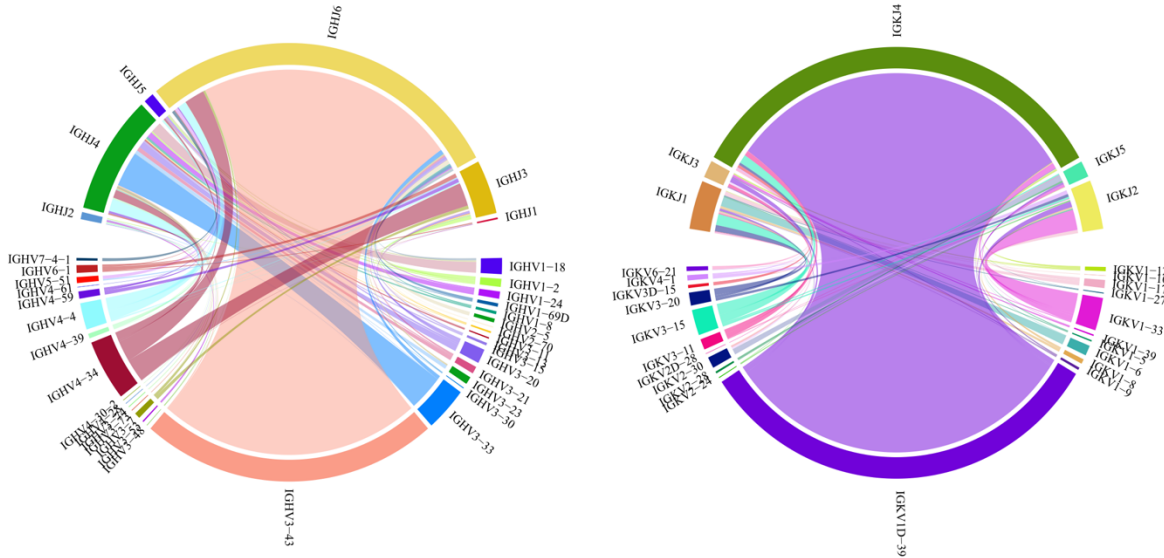

64 **Figure S5. Distribution of heavy- and light- chain V/J segment recombination in TAA-RAMIHM**  
65 **mice, Related to Figures 3 and 4**

66 **A**, Chord diagrams (circo plots) showing the distribution of all heavy- and light-chain V and J gene-  
67 segment recombination obtained from CD22 memory B cell library. Interconnecting lines indicate the  
68 relationship between antibodies that share V and J gene-segment at both IGH and IGL.

69 **B**, Chord diagrams (circo plots) showing the distribution of all heavy- and light-chain V and J gene-  
70 segment recombination obtained from GPRC5D memory B cell library. Interconnecting lines indicate the  
71 relationship between antibodies that share V and J gene-segment at both IGH and IGL.

72

**Figure S6**

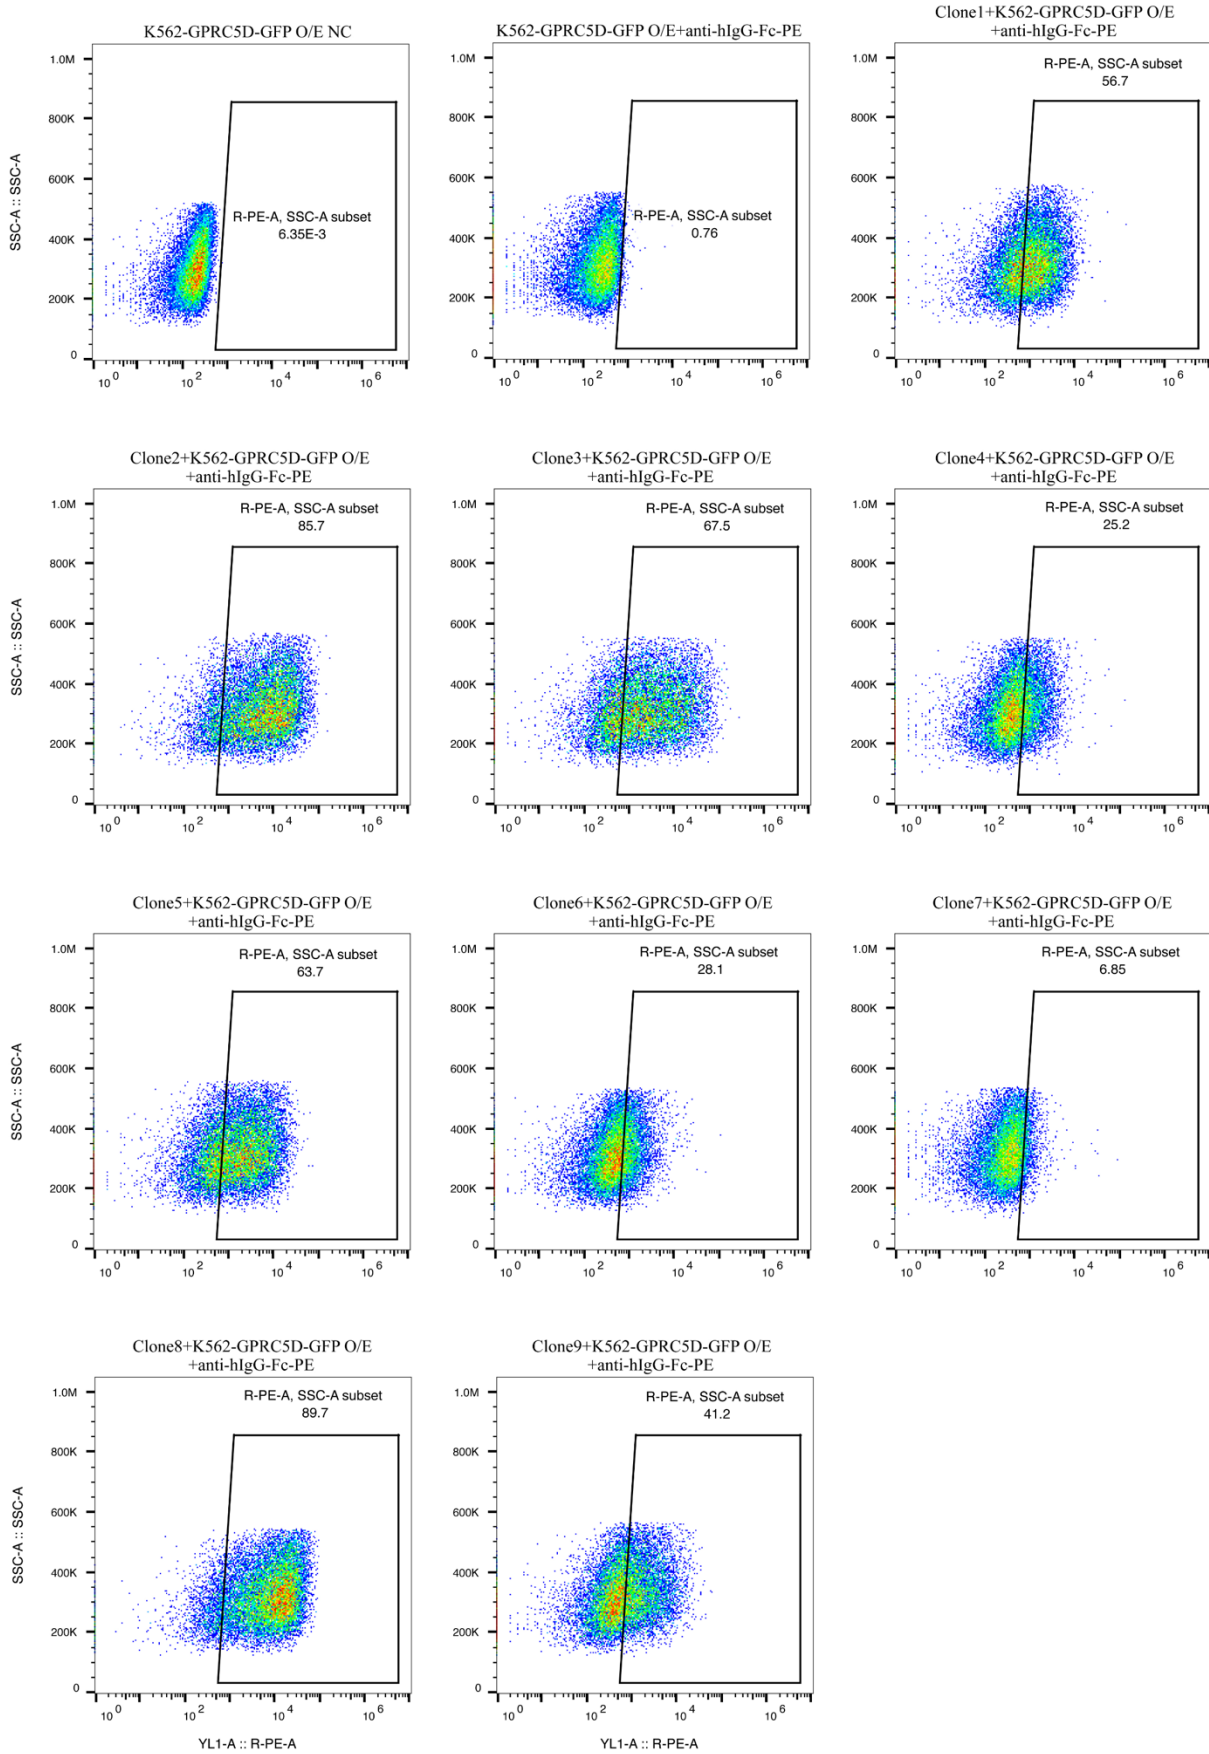

74

75 **Figure S6. Validation of individual clones of mAbs's binding against GPRC5D-overexpressed K562**  
76 **cells, Related to Figure 4**

77 Flow cytometry plots of individual clones of RAMIHM-generated human GPRC5D mAbs's binding against  
78 GPRC5D-overexpressed K562 cells.

79

**Figure S7**

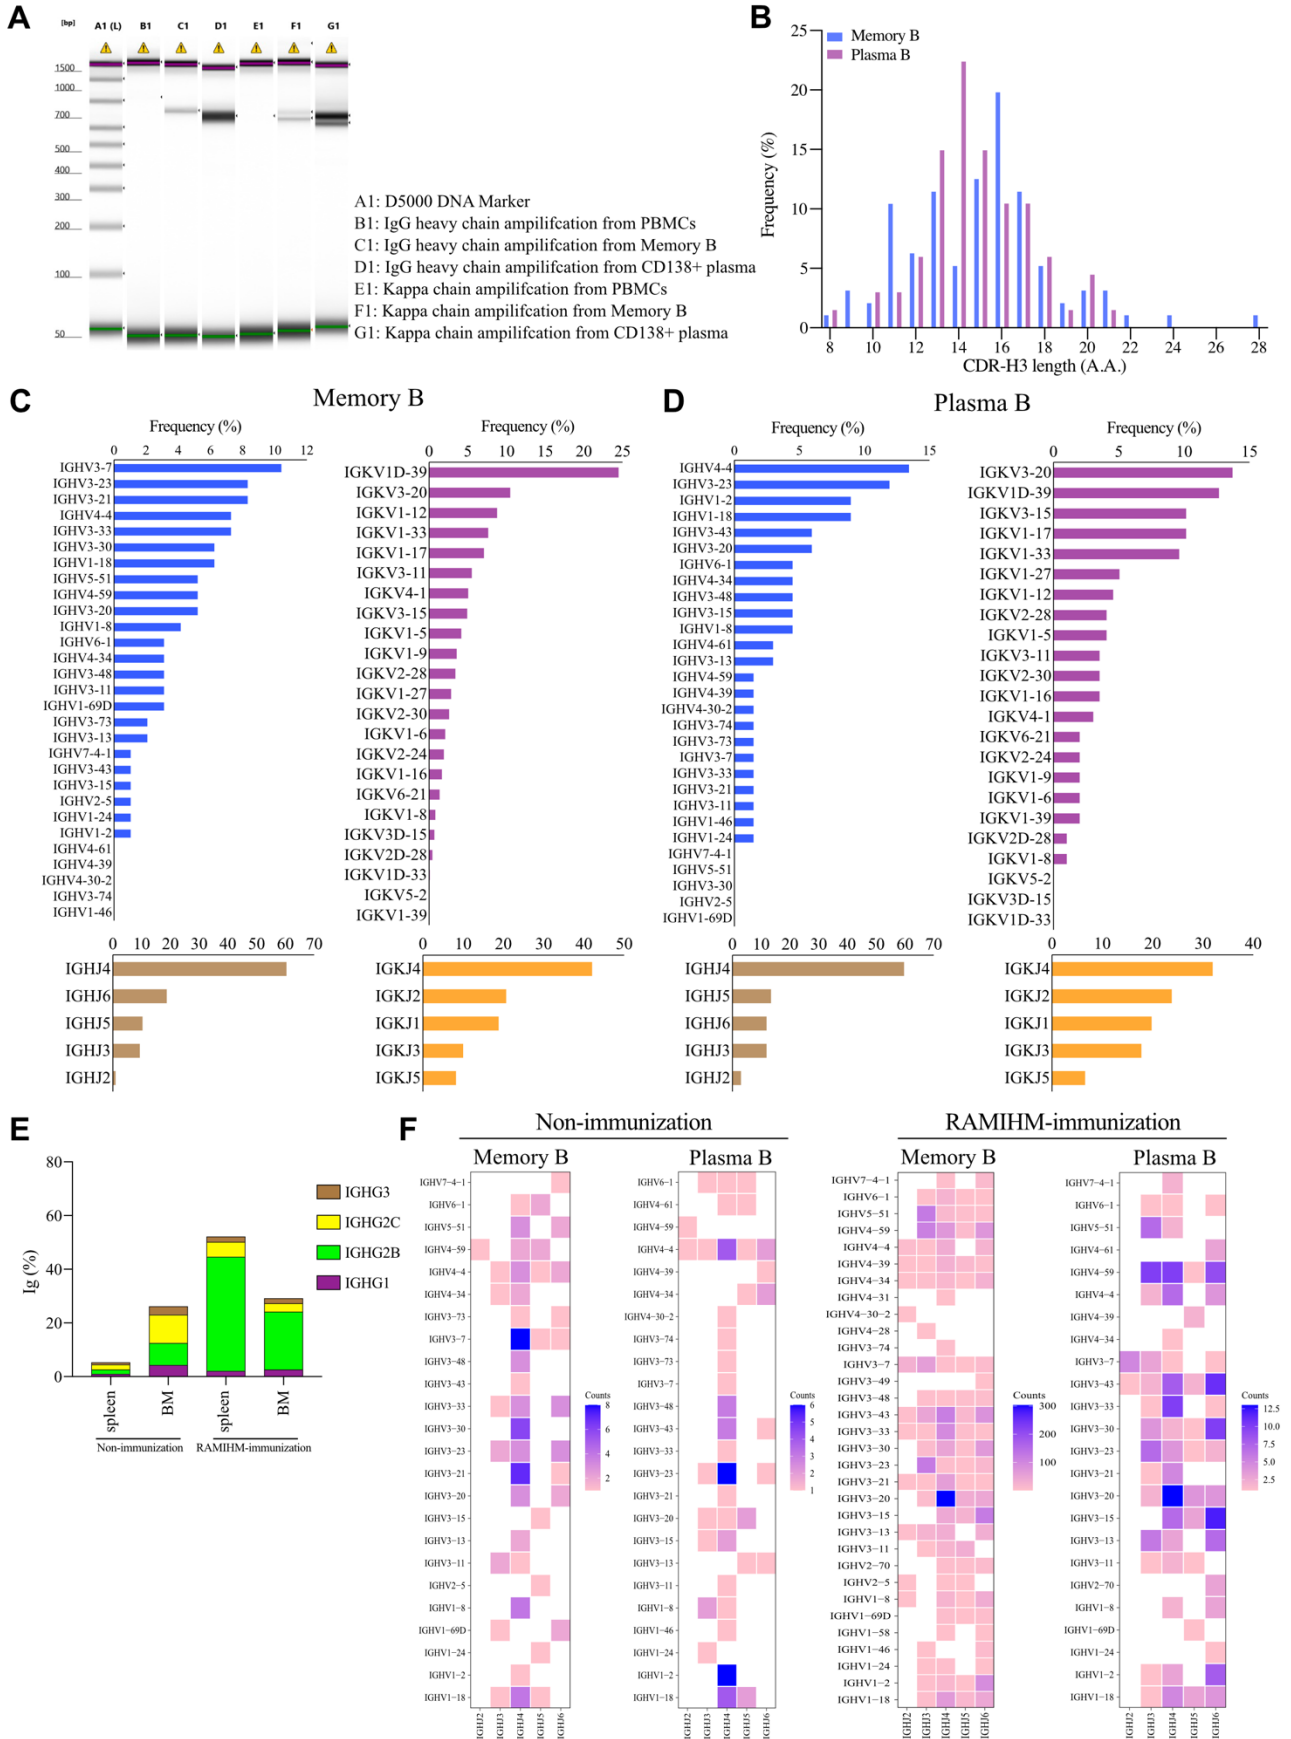

81 **Figure S7. Natural B cell levels in non-immunized humanized mouse, Related to Figures 1, 3, 4**  
82 **A**, Single cell BCR libraries construction from non-immunized humanized mouse. PCR products from  
83 Memory B library, Plasma B library and PBMC library were loaded in separate lanes.  
84 **B**. Distribution of heavy chain complementarity-determining region 3 (HCDR3) length in memory B cells  
85 and plasma B cells from non-immunized humanized mouse.  
86 **C**, Global frequencies of IGHV, IGHJ, IGKV, and IGKJ genes usage in memory B cells from non-  
87 immunized humanized mouse.  
88 **D**, Global frequencies of IGHV, IGHJ, IGKV, and IGKJ genes usage in plasma B cells from non-  
89 immunized humanized mouse.  
90 **E**, Antibody isotype switching was induced by Omicron BA.1-RAMIHM.  
91 **F**, Rapid antibody clonal expansion and diversification were elevated by Omicron BA.1-RAMIHM.  
92  
93  
94  
95
